1 A Tn-seq screen of *Streptococcus pneumoniae* uncovers DNA repair as the major pathway for  
2 desiccation tolerance and transmission

3  
4 Allison J. Matthews<sup>ab</sup>, Hannah M. Rowe<sup>c</sup>, Jason W. Rosch<sup>c</sup>, Andrew Camilli<sup>a\*</sup>

5  
6 <sup>a</sup>Department of Molecular Biology, Tufts University School of Medicine, Boston, Massachusetts, USA

7 <sup>b</sup>Graduate Program in Molecular Microbiology, Graduate School of Biomedical Sciences, Tufts  
8 University School of Medicine, Boston, Massachusetts, USA

9 <sup>c</sup>Department of Infectious Diseases, St Jude Children's Research Hospital, Memphis, TN, USA

10  
11  
12 Running Head: Desiccation tolerance Tn-seq in *S. pneumoniae*

13  
14  
15 \*Address correspondence to Andrew Camilli, [andrew.camilli@tufts.edu](mailto:andrew.camilli@tufts.edu)

## 27 ABSTRACT

28 *Streptococcus pneumoniae* is an opportunistic pathogen that is a common cause of serious  
29 invasive diseases such as pneumonia, bacteremia, meningitis, and otitis media. Transmission of this  
30 bacterium has classically been thought to occur through inhalation of respiratory droplets and direct  
31 contact with nasal secretions. However, the demonstration that *S. pneumoniae* is desiccation tolerant,  
32 and therefore environmentally stable for extended periods of time, opens up the possibility that this  
33 pathogen is also transmitted via contaminated surfaces (fomites). To better understand the molecular  
34 mechanisms that enable *S. pneumoniae* to survive periods of desiccation, we performed a high  
35 throughput transposon sequencing (Tn-seq) screen in search of genetic determinants of desiccation  
36 tolerance. We identified 42 genes whose disruption reduced desiccation tolerance, and 45 genes that  
37 enhanced desiccation tolerance. The nucleotide excision repair pathway was the most enriched  
38 category in our Tn-seq results, and we found that additional DNA repair pathways are required for  
39 desiccation tolerance, demonstrating the importance of maintaining genome integrity after  
40 desiccation. Deletion of the nucleotide excision repair gene *uvrA* resulted in decreased transmission  
41 efficiency between infant mice, indicating a correlation between desiccation tolerance and  
42 pneumococcal transmission. Understanding the molecular mechanisms that enable pneumococcal  
43 persistence in the environment may enable targeting of these pathways to prevent fomite  
44 transmission, thereby preventing the establishment of new colonization and any resulting invasive  
45 disease.

46  
47 **KEYWORDS:** *Streptococcus pneumoniae*, desiccation, xerotolerance, DNA repair, nucleotide  
48 excision repair, *uvrA*, fomite transmission

49  
50  
51  
52

## 53 INTRODUCTION

54 For pathogens with no environmental reservoir, transmission between hosts is necessary for  
55 the species to survive. In the case of *Streptococcus pneumoniae* (the Pneumococcus), a common  
56 member of the human nasopharyngeal microbiome, most transmission events result in asymptomatic  
57 and transient colonization which has been termed the carrier state (1–4). However, in susceptible  
58 individuals such as children and the elderly, *S. pneumoniae* can be aspirated into the lungs resulting  
59 in pneumonia and invasive diseases such as bacteremia and meningitis (5). Due to high carriage  
60 rates of *S. pneumoniae* within the population, invasive pneumococcal disease continues to be a  
61 leading cause of lower respiratory morbidity and mortality as well as a significant socioeconomic  
62 burden (6–8). As colonization precedes invasive pneumococcal disease, developing ways to prevent  
63 colonization, such as limiting fomite transmission, would serve to reduce the incidence of invasive  
64 disease.

65 The prevailing model of pneumococcal transmission posits that transmission occurs via  
66 respiratory droplets and direct contact with nasal secretions. However, previous work has  
67 demonstrated that *S. pneumoniae* can survive long periods of desiccation (9, 10). Upon subsequent  
68 rehydration, a proportion of the bacteria were found to remain viable and capable of establishing  
69 colonization. Thus, environmentally stable bacteria desiccated on surfaces, also referred to as  
70 fomites, may serve as an alternate source of pneumococcal infection.

71 Surfaces contaminated with infectious microbes are an important mode of transmission for a  
72 number of pathogens (11–18). In particular, fomites have been demonstrated to be a frequent source  
73 of nosocomial infections (19–24). Therefore, the demonstration that *S. pneumoniae* can be isolated  
74 from surfaces in a daycare provides evidence that fomite reservoirs of the bacterium exist in the  
75 community (10, 25). As *S. pneumoniae* is desiccation tolerant for an extended period of time, it is  
76 likely that the bacterium uses fomite transmission as one of multiple strategies to reach new hosts.  
77 Furthermore, increased desiccation tolerance of a pyruvate oxidase mutant has been shown to

78 correlate with improved transmission between infant mice in a murine model of pneumococcal  
79 transmission, providing support to the hypothesis of pneumococcal fomite transmission (26).

80 Although fomites may constitute an important mode of transmission for *S. pneumoniae*, little is  
81 known about the molecular mechanisms that enable *S. pneumoniae* to remain stable in the  
82 environment as the bacteria desiccate and are left without access to nutrients. Desiccation is  
83 theorized to impose an enormous amount of stress on an organism. Some of these stresses include  
84 DNA damage, protein damage, osmotic shock, oxidative damage, protein denaturation and cross-  
85 linking, and reduced membrane fluidity (27). These challenges are so great that the majority of  
86 bacteria are unable to survive extended periods of desiccation (28). Therefore, the pneumococcus  
87 must have evolved mechanisms to cope with the challenges imposed by desiccation. In this study, we  
88 used a high throughput mutant screening approach to identify genes that are involved in the  
89 desiccation tolerance response of *S. pneumoniae* in order to better characterize environmental  
90 persistence of the bacterium.

## 92 RESULTS

### 93 Tn-seq screen to identify genes involved in *S. pneumoniae* desiccation tolerance

94 To uncover which *S. pneumoniae* factors are required for desiccation tolerance, we employed  
95 a high-throughput transposon sequencing (Tn-seq) approach (29). In vitro transposition of a mini-  
96 transposon and subsequent transformation of the transposed DNA into bacteria produced a library of  
97 ~64,000 unique insertion mutants in the serotype 2 strain D39. This high-complexity library was then  
98 screened for sensitivity to desiccation using a previously described desiccation assay (9). To perform  
99 the desiccation, bacteria were grown to near-confluence on blood agar and then collected and spread  
100 thinly on polystyrene petri plate lids and left in the dark to desiccate for 48 hours. In order to isolate  
101 survivors, desiccated bacteria were resuspended and plated on blood agar and then grown overnight.

102 To prepare the libraries for sequencing, genomic DNA was isolated from the pooled  
103 desiccation survivors as well as the input library. The genomic junctions of all transposon insertion

mutants were amplified by HTML-PCR as described (29) and each sample was uniquely barcoded. The location of each transposon insertion was then identified using massively parallel sequencing on the Illumina platform and the relative frequency of each mutant within the library was then determined using normalized read counts. Frequencies of each unique insertion mutant were compared from before and after desiccation and this was used to calculate a fitness ( $W$ ) value for each insertion. Mean fitness of a gene was then calculated by averaging the fitness of all transposon insertions within a gene.

As expected, the majority of genes when disrupted by the transposon had a neutral impact on bacterial fitness during desiccation, resulting in a fitness of  $\sim 1$  (Fig.1; Supplemental Table S1). All genes showing a 20% or greater change in fitness ( $W$ ) with a P value below  $2.33 \times 10^{-4}$  ( $-\log[P\text{value}] > 3.633$ ) were considered to have a significant deviation from wild-type. Both genes that contribute to desiccation tolerance (desiccation sensitive) and ones that hindered it (desiccation resistant) were identified (Fig. 1A and B, respectively). Reproducibility was high between the two biological replicates (Pearson's correlation,  $R=0.801$ ), providing confidence in the results of the screen (Fig.1C). In total, this screen identified 42 genes whose disruption by transposon insertion render the bacterium desiccation sensitive and 45 genes that resulted in improved survival (Table 1).

These genes were categorized by function using annotations and GO terms from Kegg genome database and UniProt (Fig. 1D). Multiple categories of gene disruption rendered the bacteria desiccation sensitive. In particular, genes required for DNA repair and replication (6) and nucleotide metabolism (3) were abundant among the sensitive mutants. To further support the significance of this category of genes, a Gene Ontology (GO) enrichment for cellular components revealed that the excinuclease repair complex UvrABC, which carries out nucleotide excision repair, was enriched 23-fold among our hits. This emphasizes the importance of repairing DNA damage after desiccation and suggests that there is substantial DNA damage that occurs. This is well supported by work in other bacteria that demonstrates the necessity of DNA repair for successful desiccation resistance (30–32). Other functional categories that render the bacterium sensitive to desiccation pertain to composition

130 of the membrane and cell wall. These include the penicillin binding proteins *pbp1A* and *pbp2A* which  
131 are responsible for modifying the cell wall, as well as, cardiolipin synthetase which produces the lipid  
132 cardiolipin that increases membrane fluidity. Functional categories that result in desiccation  
133 resistance include 12 metabolic genes of which five are involved in amino acid metabolism, and 16  
134 different transporters, 3 of which encode sugar transporters. These categories of gene indicate a role  
135 for metabolism in desiccation tolerance.

### 137 **Validation of putative desiccation tolerance genes**

138 In order to validate the results of our screen, we used allelic replacement to produced deletion  
139 mutants of 28 genes. Genes were selected for validation if they had a substantial fitness change, are  
140 not pleiotropic in other conditions (33). Genes of known and unknown function were chosen. These  
141 deletion mutants were then tested in desiccation tolerance competitions with wild-type. Each mutant  
142 was mixed at a 1:1 ratio with wild-type and then plated for overnight growth. The plate grown bacteria  
143 were then challenged with a 4 day desiccation and a competitive index (CI) was calculated as the  
144 ratio of mutant/wild type in the output divided by the ratio from the input. Similar to the fitness values,  
145 a CI less than 1 represents a defect in desiccation tolerance, while a CI greater than 1 represents  
146 improved survival. We found that 22 genes validated with competitive indices that were significantly  
147 different than that of a neutral gene deletion, *SPD\_0022* (Fig. 2; Supplemental Table S2). The  
148 majority of genes validated in desiccation competition assays demonstrating the robustness of our  
149 screen.

150 We found that both nucleotide excision repair genes tested, *uvrA* and *uvrB*, had a significant  
151 defect in desiccation tolerance resulting in median competitive indices of 0.47 and 0.35 (Fig. 2). In  
152 addition, the homologous recombination helicase *recD* and nucleotide biosynthetic gene *prs2* also  
153 displayed significant fitness defects. Due to the significant enrichment of the excinuclease DNA repair  
154 complex and the validation of other DNA repair and maintenance genes we chose to further  
155 characterize the impact of DNA repair on desiccation tolerance.

156

## 157 **DNA repair pathways involved desiccation tolerance**

158 Previous work has demonstrated that the drying of bacteria results in extensive DNA damage  
159 (34–36). However, the types of DNA damage that occur in desiccating bacteria have been theorized,  
160 but there is little direct evidence. To genetically dissect the specific types of DNA damage that are  
161 occurring during desiccation, we chose to delete a variety of DNA repair genes, including some not  
162 identified in our Tn-seq screen because they were above the P value cutoff. Because specific DNA  
163 repair pathways are required for resolving particular DNA lesions, increased desiccation sensitivity  
164 resulting from disruption of a DNA repair pathway would suggest a particular type of damage is  
165 occurring.

166 Due to the general essentiality of DNA repair for bacterial viability, deletion of many DNA repair  
167 genes is lethal. For this reason, we selected genes that function in specific DNA repair pathways but  
168 are not essential. We tested multiple genes in the nucleotide excision repair (NER) pathway, including  
169 two that are part of the core NER complex (*uvrA*, *uvrB*) as well as a gene that is only involved in  
170 transcription coupled NER (*MFD*). Deletion of *uvrA* and *uvrB* resulted in a significant competitive  
171 disadvantage in desiccation survival, while deletion of *MFD* had a neutral effect on desiccation  
172 tolerance (Fig. 3). This suggests that the global genome repair pathway of NER is important for  
173 desiccation tolerance, but transcription coupled repair is dispensable. We were able to complement  
174 *uvrA* at a neutral locus in the chromosome, demonstrating that the *uvrA* deletion was indeed  
175 responsible for the observed desiccation sensitivity (Fig 3). To query the significance of homologous  
176 recombination (HR), we deleted the HR helicase *recD* and found that this results in a significant loss  
177 of viability after desiccation, suggesting homologous recombination is necessary for desiccation  
178 tolerance. Next we deleted two glycosylases (*mutM*, *mutY*) involved in base excision repair (BER)  
179 and found that both glycosylases have a competitive disadvantage, although the competitive index of  
180  $\Delta mutM$  is significantly lower than that of  $\Delta mutY$ , suggesting that it has a greater impact on repairing  
181 DNA damage resulting from desiccation (Fig. 3). Finally, we tested three factors involved in mismatch



182 repair (MMR) (*xseA*, *mutL*, *mutS1*). MutS1 and MutL act in a stepwise fashion with MutS first  
183 recognizing the nucleotide mismatch followed by binding of MutL which will recruit an endonuclease  
184 to the complex. Neither of these genes displayed a competitive disadvantage in desiccation,  
185 suggesting that mismatches are not the primary type of DNA damage occurring during desiccation  
186 (Fig. 3). The desiccation sensitivity displayed by  $\Delta xseA$  (Fig. 3), a bi-directional single-stranded DNA  
187 exonuclease (ExoVII) that hydrolyzes single stranded DNA can be explained by the fact that this  
188 protein is involved in three different DNA repair pathways: mismatch repair, single strand break  
189 repair, and homologous recombination. Based on the neutral impact of *mutL* and *mutS* deletion, we  
190 suggest that XseA is likely required for repairing single and double strand breaks after desiccation,  
191 and not mismatched nucleotides. This makes sense as a desiccated bacterium is likely dormant and  
192 not actively replicating its genome, which is where replication errors usually occur.

193 Having identified BER pathway genes *mutM* and *mutY*, which have both been characterized to  
194 repair oxidatively damaged guanines (8-oxoG) (37), we wanted to see if endogenous hydrogen  
195 peroxide production was responsible for oxidative damage that may be repaired by BER. *S.*  
196 *pneumoniae* is well known to produce hydrogen peroxide without a detoxification mechanism. The  
197 primary producer of hydrogen peroxide is pyruvate oxidase (SpxB) (38), which when deleted resulted  
198 in improved desiccation resistance in our screen (Table 1). This desiccation resistance was  
199 recapitulated in competition against wild-type (Fig. 4). To probe the impact of hydrogen peroxide  
200 production on DNA damage during desiccation, we performed desiccation competitions where we  
201 removed the majority of hydrogen peroxide from the system by deleting *spxB* in both the wild-type  
202 background and our DNA repair mutants. If the DNA repair mutant were responsible for repairing  
203 oxidative damage to the DNA caused by endogenous hydrogen peroxide, we would expect to see an  
204 abrogation of the fitness defect when *spxB* is deleted. Deletion of *spxB* caused a slight increase in  
205 competitive index of the  $\Delta mutM$  or  $\Delta uvrA$  mutants but the differences were not significant (Fig. 4),  
206 suggesting that endogenous hydrogen peroxide production by SpxB is not responsible for the  
207 majority of DNA damage that is repaired by either of these DNA repair pathways. This suggests that



208 the improved desiccation tolerance of  $\Delta spxB$  may have more to do with the metabolic role of SpxB in  
209 carbon utilization as opposed to its production of hydrogen peroxide as a metabolic byproduct.

210 In order to confirm that the UvrABC complex performs a similar function to its well  
211 characterized homolog in *Escherichia coli*, we challenged the  $\Delta uvrA$  mutant with UV irradiation. A  
212 deletion in any one of the three components of the NER complex should successfully abrogate its  
213 function as all three are required to make a functional complex (39). The *uvrA* deletion mutant was  
214 significantly more susceptible to UV treatment, resulting in a 3-log reduction in survival below that of  
215 wild-type (Fig. 5). We were able to rescue this phenotype by complementing the *uvrA* gene back at a  
216 neutral gene locus, resulting in wild-type survival (Fig. 5). Having confirmed that *uvrA* has a significant  
217 impact on desiccation survival and that it's behavior mimics that of its homologs in other bacteria, we  
218 wanted to investigate the impact of *uvrA* deletion and other desiccation mutants on transmission.

## 220 **Transmission efficiency of selected desiccation mutants**

221 As we hypothesize that fomite transmission of *S. pneumoniae* is likely an important method of  
222 reaching new hosts, we wanted to see if our desiccation tolerance mutants would impact how  
223 efficiently bacteria are passed between mice in a murine model of transmission. Previous work has  
224 shown a correlation between transmission efficiency and desiccation tolerance using  $\Delta spxB$ ; *spxB*  
225 deletion results in both improved desiccation tolerance as well as increased transmission efficiency  
226 (26). Four hits from our screen were selected to be tested in the transmission assay: *uvrA*, *bgaC*,  
227 *SPD\_1622*, and *SPD\_0996*.

228 The transmission assay was performed by colonizing half of a mouse litter with serotype 19F  
229 *S. pneumoniae* (BHN97). These colonized mice are the pneumococcal donors, while the uncolonized  
230 littermates are the contact mice. All mice were then returned to their cage with the dam and  
231 transmission was tracked over the next 10 days by tapping the nares of the mice against a plate.  
232 Detection of colonies on two subsequent days was considered a colonization event. We found that  
233 transmission efficiency of the  $\Delta uvrA$  mutant was significantly reduced as compared to wild-type

234 (BHN97) (Fig. 6). The decreased transmission rate of  $\Delta uvrA$  is not due to lower levels of colonization  
235 from the donor mice as colonization levels were assessed at the end of the experiment and there was  
236 no significant difference between wild-type and  $\Delta uvrA$ . There was no significant difference in  
237 transmission efficiency in the other mutants tested, except for *bgaC* which also had reduced levels of  
238 colonization in the donor mice (Fig. S1). Altogether, this demonstrates a correlation between  
239 decreased desiccation tolerance and lower transmission efficiency.

## 241 DISCUSSION

242 *S. pneumoniae* has been demonstrated to be desiccation tolerant, surviving in a dehydrated  
243 state for up to 30 days (9, 10). However, little is known about the mechanisms that enable the  
244 bacterium to persist in this state. Here we have used transposon insertion sequencing (Tn-seq) to  
245 investigate the genetic factors that influence desiccation tolerance of *S. pneumoniae*. We screened  
246 approximately 64,000 unique transposon insertion mutants using a 2-day desiccation assay on a  
247 plastic surface. After stringent analysis of the Tn-seq results, we identified 42 genes that result in  
248 reduced fitness and 45 genes that lead to improved fitness. Within these hits were a number of  
249 functional categories that impacted desiccation tolerance.

250 A major category was that of DNA repair and replication. DNA damage is likely to be one of the  
251 most significant stresses of desiccation as many parts of the cell can be remade, but the genome is  
252 the template for all necessary cellular components, therefore genome integrity is of the utmost  
253 importance. This is supported by the observation that in our screen, disruption of DNA repair and  
254 replication genes only resulted in sensitization to desiccation. Of particular interest was the nucleotide  
255 excision repair (NER) complex composed of UvrA, UvrB, and UvrC. This complex was highly  
256 enriched in our data set based on a Gene Ontology (GO) enrichment for cellular components and we  
257 found that deletion of any of these genes resulted in a significant fitness defect. UvrABC is best  
258 known to repair thymine dimers that are the result of UV damage, however our desiccations were  
259 performed in the dark, making UV an unlikely source of significant DNA damage. UvrABC has also

260 been characterized to repair other DNA lesions, including proteins that have been fused to DNA (40,  
261 41). This may occur as the loss of water results in molecular crowding and loss of hydration shells  
262 surrounding proteins and DNA within the cell, causing various cellular components to interact more  
263 than they would in a normally hydrated cell (28). Study of DNA damage in desiccated *Bacillus subtilis*  
264 spores has previously demonstrated that significant DNA-protein crosslinking occurs during  
265 desiccation (42), suggesting that this type of DNA damage likely also occurs in desiccating *S.*  
266 *pneumoniae*.

267         Single and double stranded breaks have been shown to occur as a result of desiccation (35,  
268 36) and oxidative damage is hypothesized to result from either desiccation or subsequent rehydration  
269 of bacteria (43). These other forms of DNA damage would require different repair pathways to resolve  
270 specific DNA lesions. When tested, we found that DNA repair pathways which are capable of  
271 repairing these types of damage were also required for desiccation tolerance. These pathways  
272 include homologous recombination (HR) which would repair double strand breaks and base excision  
273 repair (BER) which is capable of repairing modified nucleotides such as oxidatively damaged bases.  
274 In addition, we found that nucleotide biosynthesis genes (*prs2*, *guaA* and *guaB*) involved in  
275 maintaining the pool of available nucleotides required for DNA repair and replication also had a  
276 decreased fitness in desiccation. Mismatch repair (MMR) was found to have little impact on  
277 desiccation tolerance, which can be explained by the fact that MMR generally repairs errors that  
278 occur during DNA replication. As we assume the bacteria are metabolically dormant, active DNA  
279 replication is unlikely to occur during desiccation. Our finding that deletion of additional DNA repair  
280 pathways results in a fitness defect suggests that multiple types of DNA damage are occurring during  
281 desiccation and a full complement of DNA repair systems is required for the bacteria to survive after  
282 desiccation.

283         A second category that emerged from our screen was genes that impact structural integrity of  
284 the cell. These include genes involved in cell wall and cell division as well as lipid metabolism and  
285 envelope biogenesis. During desiccation the volume of the cell decreases while the membrane and

286 cell wall remain their original size (28). This results in dense packing of phospholipids resulting in  
287 decreased membrane fluidity and distortion of the membrane which can eventually result in  
288 membrane rupture. We found that production of the phospholipid cardiolipin by cardiolipin synthetase  
289 (SPD\_0185) significantly improves desiccation survival. Cardiolipin is known to increase membrane  
290 fluidity which decreases packing of the membrane (44), and thus may be instrumental during  
291 desiccation. A structurally sound cell wall also likely helps avoid membrane rupture throughout  
292 desiccation as well as during the osmotic shock of rehydration. We found that two class A penicillin  
293 binding proteins (PBPs), Pbp1A and Pbp1B, were both important for wild-type levels of desiccation  
294 tolerance. The function of these two proteins is still not fully understood, however they are known to  
295 be required for maturation of the cell wall as opposed to the construction of nascent peptidoglycan  
296 (45). In addition, these genes are synthetically lethal, suggesting they share some functional  
297 redundancy in an essential process (46). Loss of type A PBP's have been characterized to lead to  
298 decreased cell-wall stiffness and fewer peptidoglycan crosslinks in *E. coli* and *B. subtilis* (47, 48).  
299 Improvements in cell wall integrity by Pbp1A and Pbp2A may increase the bacterium's resistance to  
300 osmotic shock, resulting in improved desiccation survival. It is clear that the condition of the bacterial  
301 membrane and cell wall has a large impact on pneumococcal desiccation survival.

302 Another category of interest from our screen includes metabolic genes and transporters.  
303 Previous work has demonstrated that starvation and metal sequestration result in improved  
304 desiccation tolerance of *S. pneumoniae* (26). We found multiple sugar transporters, carbohydrate  
305 catabolic genes, and a putative metal transporter whose disruption resulted in increased desiccation  
306 resistance, which is in agreement with this previous finding. However, the exact mechanism of this  
307 improved desiccation tolerance of carbohydrate and metal starved bacteria is unknown. Slower  
308 growth could result in smaller cells which will undergo less shrinkage and membrane stress as they  
309 desiccate (49). Additionally, slow growth in *Vibrio cholerae* has been shown to improve resistance to  
310 osmotic shock (50). More work should be done to understand the impact of decreased growth rate on  
311 desiccation tolerance in *S. pneumoniae*.

312 In order to demonstrate the impact of decreased desiccation tolerance on transmission, the  
313 desiccation sensitive mutant  $\Delta uvrA$  was tested in an infant mouse model of transmission. We found  
314 that deletion of *uvrA* results in decreased transmission efficiency between mice. It is known that  
315 pneumococcal shedding has a large impact on transmission efficiency (51), therefore it was important  
316 to demonstrate that  $\Delta uvrA$  did not have a colonization defect that could result in decreased shedding.  
317 We found that the bacterial load of  $\Delta uvrA$  in the nasopharynx was the same as wild-type, suggesting  
318 colonization density is not the cause of the transmission defect. We suggest that the transmission  
319 defect is due to the desiccation sensitivity of our mutant, however we do not have direct evidence that  
320 transmission occurs from desiccated bacteria in our murine model. The possibility remains that  
321 transmission occurs by direct contact between mice. However, we hypothesize that some of the shed  
322 *S. pneumoniae* become desiccated on surfaces in the cage as well as the skin of the pups and the  
323 dam. This is supported by the observation that desiccated *S. pneumoniae* remain capable of  
324 colonizing a new host (9). Additionally, an association between desiccation tolerance and  
325 transmission efficiency has been observed in a pyruvate oxidase mutant, which is both more  
326 desiccation resistant and has increased transmission rates in the infant mouse model (26). While  
327 these results do not directly demonstrate fomite transmission, they do exhibit a strong correlation  
328 between desiccation tolerance and transmission efficiency.

329 This work has highlighted a number of genetic factors that influence desiccation tolerance of *S.*  
330 *pneumoniae*. In particular, the ability to repair damaged DNA appears to be a key factor that enables  
331 bacterial survival and transmission between hosts. Use of DNA damaging agents may be an effective  
332 strategy to eliminate bacteria from surfaces. For example, Far-UVC light (222 nm) has been  
333 demonstrated to effectively kill infectious bacteria while leaving mammalian skin undamaged (52–54).  
334 Utilization of such sterilizing techniques that cause additional DNA damage may prove to be an  
335 effective method to decrease the bacterial load on surfaces, thereby reducing pathogen transmission.

## 337 MATERIALS AND METHODS

338 **Bacterial Strains and Growth Conditions.** All experiments were performed with *S. pneumoniae*  
339 serotype 2 strain D39 and isogenic mutants, except transmission assays which were performed with  
340 serotype 19F strain BHN97 (55). Bacteria were cultivated in a 37°C incubator with 5% CO<sub>2</sub>. Liquid  
341 cultures were grown on Todd Hewitt broth (BD Biosciences) supplemented with 5% yeast extract  
342 (Fisher Scientific) and 300 U/ml catalase (Worthington Biochemicals) (THY broth). Overnight growth  
343 was performed on blood agar (BA) plates which consist of tryptic soy agar (Sigma-Aldrich) with 5%  
344 sheep's blood (Northeast Laboratory Services). Antibiotics were used at the following concentrations:  
345 chloramphenicol 4 µg/mL and spectinomycin 200 µg/mL.

346  
347 **Strain construction.** Marked deletion strains were constructed by transforming competent *S.*  
348 *pneumoniae* with PCR products carrying the desired deletion. Allelic exchange PCR products were  
349 made using splicing by overlap extension (SOE) PCR as described (56), where the chloramphenicol  
350 cassette was spliced to a minimum of 1 kb of sequencing flanking each side of the gene to be  
351 deleted. The flanking sequences allow for allelic replacement by double cross-over homologous  
352 recombination. Complementation was performed by placing the promoter region, coding sequence,  
353 and spectinomycin cassette into a neutral gene locus (SPD\_0022). All mutations were confirmed by  
354 sanger sequencing or whole genome sequencing. Strains used in this study are listed in table 2.

355  
356 **Desiccation protocol.** *S. pneumoniae* were struck from a frozen glycerol stock onto blood agar  
357 plates and grown overnight. Colonies were subsequently resuspended into THY broth and diluted to  
358 an optical density at 600 nm (OD<sub>600</sub>) of 0.1. 50 µL of a 10-fold dilution was then spread onto a blood  
359 agar plate and allowed to grow for 16 hours. The resulting semi-confluent colonies were pooled and  
360 scraped off a plate using a plastic wedge (Bio-Rad gel releaser 1653320) and split into equal  
361 sections. Each section was spread very thinly on a polystyrene petri plate lid using the wedge. Input  
362 CFU was quantified by immediate resuspension of the bacteria from several lids in THY and plating of  
363 10-fold dilutions on blood agar. The remaining bacteria were then allowed to desiccate on lids for 2 or

364 4 days depending on the experiment, after which bacteria were resuspended in THY and plated for  
365 viable CFU counts. Bacterial counts were used to calculate percent survival.

366 Competitions were performed as described above using a 1:1 mixture of unmarked WT and a  
367 chloramphenicol resistant mutant to plate the bacterial lawn. Dilutions of bacteria collected from lids  
368 on day 0 and day 4 were plated on blood agar and incubated for 16 hours. The resulting colonies  
369 were replica-plated onto blood agar containing 4 µg/ml chloramphenicol to assess the ratio of mutant  
370 to WT. All were done with 5 to 10 biological replicates.

371  
372 **Transposon Library Construction.** The transposon library was constructed as previously described  
373 (57). Briefly, in vitro transposition was performed using purified transposase MarC9, genomic DNA,  
374 and the mini transposon magellan6, which contains a spectinomycin-resistance gene. Transposed  
375 DNA was then transformed into competent *S. pneumoniae*, and bacteria carrying a transposon were  
376 selected for by plating on blood agar supplemented with 200 µg/ml spectinomycin. This pool of  
377 mutants was grown up in THY, then collected and frozen down in 20% glycerol (final concentration)  
378 for further experimentation.

379  
380 **Desiccation Tn-seq screen.** Libraries that were previously frozen were plated on blood agar and  
381 grown for 16 hours. Each biological replicate consisted of ten 150 mm diameter blood agar plates.  
382 The following day the bacterial lawns were collected, mixed together, and desiccated as described  
383 above. Three input samples were collected immediately after spreading on lids and plated on blood  
384 agar. Five output samples were collected after 2 days of desiccation and plated on blood agar. After  
385 overnight growth, bacteria were collected and frozen as glycerol stocks for future isolation of genomic  
386 DNA.

387  
388 **Sequencing and Analysis Pipeline.**



389 Genomic DNA was isolated using the DNeasy Blood and Tissue Kit (Qiagen, 69504). Samples were  
390 prepared for sequencing using the HTML PCR method (29). Briefly, genomic DNA was sheared via  
391 sonication in a cuphorn sonicator and poly-C tails were added to the 3' ends of all fragments using  
392 terminal deoxynucleotidyl transferase. Transposon junctions were amplified through PCR  
393 amplification using primers specific for the Magellan6 transposon and the poly-C-tail. A subsequent  
394 nested PCR was performed to add unique barcodes to each sample. Sequencing was performed as  
395 50 bp single-end reads on an Illumina HiSeq 2500 at the Tufts University Core Facility.

396  
397 Fitness was calculated as previously described (57). Briefly, reads were mapped to the D39 genome  
398 using Bowtie (58). Transposon insertions at each gene locus were quantified for all input and output  
399 samples and the data were normalized to the total number of reads in each sample to account for  
400 slight variations in read depth. Fitness for each unique insertion was calculated as previously  
401 described (29). No change is quantified as a fitness of 1, representing a neutral gene. Increased  
402 presence in the output results in a fitness greater than 1, while decreased presence in the output  
403 produces a fitness less than 1. Fitness values were then normalized against a list of neutral genes  
404 from D39 to artificially set those gene's fitness to 1 and the same factor was used to normalize all  
405 other fitness values. Mean fitness of a gene was calculated by averaging all unique insertions across  
406 a gene. A minimum cutoff of 4 unique transposon insertions per gene was applied in addition to a  
407 read cutoff of 15 reads per transposon insertion. Next a fitness cutoff was applied to remove all genes  
408 with less than a 20% fitness change from the neutral fitness of 1. Finally, statistical significance was  
409 determined using a sample t-test with Bonferroni correction for multiple comparisons.

#### 410 411 **UV irradiation challenge.**

412 Strains were grown up in THY broth to mid-log phase. Cultures were washed and resuspended in  
413 PBS, then 50  $\mu$ l was spotted onto parafilm. Bacteria were exposed to 15 millijoules of ultraviolet light  
414 (254 nm) using a Stratagene UV crosslinker. Bacteria from before and after UV treatment were plated

415 on blood agar to quantify CFU and this was used to calculate percent survival. All were done with six  
416 biological replicates over two separate days.

### 418 **Transmission assay.**

419 This assay was performed as previously described (26). Briefly, litters of 4-day old C57/BL6 infant  
420 mice were split into two equal groups. The first group was colonized with either wild-type or mutant  
421 serotype 19F strain BHN97, termed the donor mice. The other group was left uncolonized and  
422 referred to as the contact mice. All mice from the litter were then placed back in the cage with the  
423 dam. Transmission was tracked over the course of 10 days by tapping the nares of the contact mice  
424 against a blood agar plate. Detection of bacteria on two subsequent days was defined as a  
425 transmission event. At the conclusion of the transmission experiment, all mice were sacrificed, and  
426 the level of nasopharyngeal colonization was quantified to ensure that varied transmission levels are  
427 not the result of increased or decreased shedding from the donor mice.

### 429 **REFERENCES**

- 430 1. Bogaert D, De Groot R, Hermans PWMM. 2004. *Streptococcus pneumoniae* colonisation: The  
431 key to pneumococcal disease. *Lancet Infectious Diseases* 4:144–154.  
432 [https://doi.org/10.1016/S1473-3099\(04\)00938-7](https://doi.org/10.1016/S1473-3099(04)00938-7).
- 433 2. Sleeman KL, Griffiths D, Shackley F, Diggle L, Gupta S, Maiden MC, Moxon ER, Crook DW,  
434 Peto TEA. 2006. Capsular Serotype–Specific Attack Rates and Duration of Carriage of  
435 *Streptococcus pneumoniae* in a Population of Children. *The Journal of Infectious Diseases*  
436 194:682–688. <https://doi.org/10.1086/505710>.
- 437 3. Mosser JF, Grant LR, Millar E V., Weatherholtz RC, Jackson DM, Beall B, Craig MJ, Reid R,  
438 Santosham M, O'Brien KL. 2014. Nasopharyngeal Carriage and Transmission of *Streptococcus*  
439 *pneumoniae* in American Indian Households after a Decade of Pneumococcal Conjugate  
440 Vaccine Use. *PLoS ONE* 9:e79578. <https://doi.org/10.1371/journal.pone.0079578>.

- 441 4. Austrian R. 1986. Some aspects of the pneumococcal carrier state. *Journal of Antimicrobial*  
442 *Chemotherapy* 18:35–45. [https://doi.org/10.1093/jac/18.Supplement\\_A.35](https://doi.org/10.1093/jac/18.Supplement_A.35).
- 443 5. van der Poll T, Opal SM. 2009. Pathogenesis, treatment, and prevention of pneumococcal  
444 pneumonia. *The Lancet* 374:1543–1556. [https://doi.org/10.1016/S0140-6736\(09\)61114-4](https://doi.org/10.1016/S0140-6736(09)61114-4).
- 445 6. Troeger C, Blacker B, Khalil IA, Rao PC, Cao J, Zimsen SRM, Albertson SB, Deshpande A,  
446 Farag T, Abebe Z, Adetifa IMO, Adhikari TB, Akibu M, Al Lami FH, Al-Eyadhy A, Alvis-Guzman  
447 N, Amare AT, Amoako YA, Antonio CAT, Aremu O, Asfaw ET, Asgedom SW, Atey TM, Attia  
448 EF, Avokpaho EFGA, Ayele HT, Ayuk TB, Balakrishnan K, Barac A, Bassat Q, Behzadifar M,  
449 Behzadifar M, Bhaumik S, Bhutta ZA, Bijani A, Brauer M, Brown A, Camargos PAM,  
450 Castañeda-Orjuela CA, Colombara D, Conti S, Dadi AF, Dandona L, Dandona R, Do HP,  
451 Dubljanin E, Edessa D, Elkout H, Endries AY, Fijabi DO, Foreman KJ, Forouzanfar MH,  
452 Fullman N, Garcia-Basteiro AL, Gessner BD, Gething PW, Gupta R, Gupta T, Hailu GB,  
453 Hassen HY, Hedayati MT, Heidari M, Hibstu DT, Horita N, Ilesanmi OS, Jakovljevic MB, Jamal  
454 AA, Kahsay A, Kasaeian A, Kassa DH, Khader YS, Khan EA, Khan MN, Khang Y-H, Kim YJ,  
455 Kisson N, Knibbs LD, Kochhar S, Koul PA, Kumar GA, Lodha R, Magdy Abd El Razek H,  
456 Malta DC, Mathew JL, Mengistu DT, Mezgebe HB, Mohammad KA, Mohammed MA,  
457 Momeniha F, Murthy S, Nguyen CT, Nielsen KR, Ningrum DNA, Nirayo YL, Oren E, Ortiz JR,  
458 PA M, Postma MJ, Qorbani M, Quansah R, Rai RK, Rana SM, Ranabhat CL, Ray SE, Rezai  
459 MS, Ruhago GM, Safiri S, Salomon JA, Sartorius B, Savic M, Sawhney M, She J, Sheikh A,  
460 Shiferaw MS, Shigematsu M, Singh JA, Somayaji R, Stanaway JD, Sufiyan MB, Taffere GR,  
461 Temsah M-H, Thompson MJ, Tobe-Gai R, Topor-Madry R, Tran BX, Tran TT, Tuem KB,  
462 Ukwaja KN, Vollset SE, Walson JL, Weldegebreal F, Werdecker A, West TE, Yonemoto N, Zaki  
463 MES, Zhou L, Zodpey S, Vos T, Naghavi M, Lim SS, Mokdad AH, Murray CJL, Hay SI, Reiner  
464 RC. 2018. Estimates of the global, regional, and national morbidity, mortality, and aetiologies of  
465 lower respiratory infections in 195 countries, 1990–2016: a systematic analysis for the Global  
466 Burden of Disease Study 2016. *The Lancet Infectious Diseases* 18:1191–1210.

- 467 [https://doi.org/10.1016/S1473-3099\(18\)30310-4](https://doi.org/10.1016/S1473-3099(18)30310-4).
- 468 7. Wahl B, O'Brien KL, Greenbaum A, Majumder A, Liu L, Chu Y, Lukšić I, Nair H, McAllister DA,  
469 Campbell H, Rudan I, Black R, Knoll MD. 2018. Burden of *Streptococcus pneumoniae* and  
470 Haemophilus influenzae type b disease in children in the era of conjugate vaccines: global,  
471 regional, and national estimates for 2000–15. *The Lancet Global Health* 6:e744–e757.  
472 [https://doi.org/10.1016/S2214-109X\(18\)30247-X](https://doi.org/10.1016/S2214-109X(18)30247-X).
- 473 8. Zhang D, Petigara T, Yang X. 2018. Clinical and economic burden of pneumococcal disease in  
474 US adults aged 19–64 years with chronic or immunocompromising diseases: an observational  
475 database study. *BMC Infectious Diseases* 18:436. <https://doi.org/10.1186/s12879-018-3326-z>.
- 476 9. Walsh RL, Camilli A. 2011. *Streptococcus pneumoniae* Is Desiccation Tolerant and Infectious  
477 upon Rehydration. *mBio* 2(3):e00092-11. <https://doi.org/10.1128/mBio.00092-11>.
- 478 10. Marks LR, Reddinger RM, Hakansson AP. 2014. Biofilm formation enhances fomite survival of  
479 *Streptococcus pneumoniae* and *Streptococcus pyogenes*. *Infection and Immunity* 82:1141–  
480 1146. <https://doi.org/10.1128/IAI.01310-13>.
- 481 11. Kraay ANM, Hayashi MAL, Hernandez-Ceron N, Spicknall IH, Eisenberg MC, Meza R,  
482 Eisenberg JNS. 2018. Fomite-mediated transmission as a sufficient pathway: a comparative  
483 analysis across three viral pathogens. *BMC Infectious Diseases* 18:540.  
484 <https://doi.org/10.1186/s12879-018-3425-x>.
- 485 12. Guerrero DM, Nerandzic MM, Jury LA, Jinno S, Chang S, Donskey CJ. 2012. Acquisition of  
486 spores on gloved hands after contact with the skin of patients with *Clostridium difficile* infection  
487 and with environmental surfaces in their rooms. *American Journal of Infection Control* 40:556–  
488 558. <https://doi.org/10.1016/j.ajic.2011.08.002>.
- 489 13. Williams C, Davis DL. 2009. Methicillin-resistant *Staphylococcus aureus* fomite survival. *Clinical*  
490 *Laboratory Science* 22:34–8.
- 491 14. Lopez GU, Gerba CP, Tamimi AH, Kitajima M, Maxwell SL, Rose JB. 2013. Transfer Efficiency  
492 of Bacteria and Viruses from Porous and Nonporous Fomites to Fingers under Different

- 493 Relative Humidity Conditions. *Applied and Environmental Microbiology* 79:5728–5734.  
494 <https://doi.org/10.1128/AEM.01030-13>.
- 495 15. Nicas M, Sun G. 2006. An Integrated Model of Infection Risk in a Health-Care Environment.  
496 *Risk Analysis* 26:1085–1096. <https://doi.org/10.1111/j.1539-6924.2006.00802.x>.
- 497 16. Hall CB, Douglas RG, Geiman JM. 1980. Possible Transmission by Fomites of Respiratory  
498 Syncytial Virus. *Journal of Infectious Diseases* 141:98–102.  
499 <https://doi.org/10.1093/infdis/141.1.98>.
- 500 17. Boone SA, Gerba CP. 2007. Significance of Fomites in the Spread of Respiratory and Enteric  
501 Viral Disease. *Applied and Environmental Microbiology* 73:1687–1696.  
502 <https://doi.org/10.1128/AEM.02051-06>.
- 503 18. Fekety R, Kim K-H, Brown D, Batts DH, Cudmore M, Silva J. 1981. Epidemiology of antibiotic-  
504 associated colitis. *The American Journal of Medicine* 70:906–908. [https://doi.org/10.1016/0002-  
505 9343\(81\)90553-2](https://doi.org/10.1016/0002-9343(81)90553-2).
- 506 19. Han JH, Sullivan N, Leas BF, Pegues DA, Kaczmarek JL, Umscheid CA. 2015. Cleaning  
507 Hospital Room Surfaces to Prevent Health Care–Associated Infections. *Annals of Internal  
508 Medicine* 163:598. <https://doi.org/10.7326/M15-1192>.
- 509 20. Carling PC, Bartley JM. 2010. Evaluating hygienic cleaning in health care settings: What you do  
510 not know can harm your patients. *American Journal of Infection Control* 38:S41–S50.  
511 <https://doi.org/10.1016/j.ajic.2010.03.004>.
- 512 21. Otter JA, Yezli S, Salkeld JAG, French GL. 2013. Evidence that contaminated surfaces  
513 contribute to the transmission of hospital pathogens and an overview of strategies to address  
514 contaminated surfaces in hospital settings. *American Journal of Infection Control* 41:S6–S11.  
515 <https://doi.org/10.1016/j.ajic.2012.12.004>.
- 516 22. Hartmann B, Benson M, Junger A, Quinzio L, Röhrig R, Fengler B, Färber UW, Wille B,  
517 Hempelmann G. 2003. Computer Keyboard and Mouse as a Reservoir of Pathogens in an  
518 Intensive Care Unit. *Journal of Clinical Monitoring and Computing* 18:7–12.

- 519 <https://doi.org/10.1023/B:JOCM.0000025279.27084.39>.
- 520 23. Cobrado L, Silva-Dias A, Azevedo MM, Rodrigues AG. 2017. High-touch surfaces: microbial  
521 neighbours at hand. *European Journal of Clinical Microbiology & Infectious Diseases* 36:2053–  
522 2062. <https://doi.org/10.1007/s10096-017-3042-4>.
- 523 24. Kramer A, Schwebke I, Kampf G. 2006. How long do nosocomial pathogens persist on  
524 inanimate surfaces? A systematic review. *BMC Infectious Diseases* 6:130.  
525 <https://doi.org/10.1186/1471-2334-6-130>.
- 526 25. Lee L, Tin S, Kelley ST. 2007. Culture-independent analysis of bacterial diversity in a child-care  
527 facility. *BMC Microbiology* 7:27. <https://doi.org/10.1186/1471-2180-7-27>.
- 528 26. Rowe HM, Karlsson E, Echlin H, Chang T-C, Wang L, van Opijnen T, Pounds SB, Schultz-  
529 Cherry S, Rosch JW. 2019. Bacterial Factors Required for Transmission of *Streptococcus*  
530 *pneumoniae* in Mammalian Hosts. *Cell Host & Microbe* 25:884-891.e6.  
531 <https://doi.org/10.1016/j.chom.2019.04.012>.
- 532 27. García AH. 2011. Anhydrobiosis in bacteria: From physiology to applications. *Journal of*  
533 *Biosciences* 36:939–950. <https://doi.org/10.1007/s12038-011-9107-0>.
- 534 28. Greffe VRG, Michiels J. 2020. Desiccation-induced cell damage in bacteria and the relevance  
535 for inoculant production. *Applied Microbiology and Biotechnology* 104:3757–3770.  
536 <https://doi.org/10.1007/s00253-020-10501-6>.
- 537 29. van Opijnen T, Lazinski DW, Camilli A. 2014. Genome-Wide Fitness and Genetic Interactions  
538 Determined by Tn-seq, a High-Throughput Massively Parallel Sequencing Method for  
539 Microorganisms. *Current Protocols in Molecular Biology* 106.  
540 <https://doi.org/10.1002/0471142727.mb0716s106>.
- 541 30. Mattimore V, Battista JR. 1996. Radioresistance of *Deinococcus radiodurans*: functions  
542 necessary to survive ionizing radiation are also necessary to survive prolonged desiccation.  
543 *Journal of bacteriology* 178:633–637. <https://doi.org/10.1128/JB.178.3.633-637.1996>.
- 544 31. Humann JL, Ziemkiewicz HT, Yurgel SN, Kahn ML. 2009. Regulatory and DNA repair genes



- 545 contribute to the desiccation resistance of *Sinorhizobium meliloti* Rm1021. *Applied and*  
546 *Environmental Microbiology*. <https://doi.org/10.1128/AEM.02207-08>.
- 547 32. Pitcher RS, Green AJ, Brzostek A, Korycka-Machala M, Dziadek J, Doherty AJ. 2007. NHEJ  
548 protects mycobacteria in stationary phase against the harmful effects of desiccation. *DNA*  
549 *Repair* 6:1271–1276. <https://doi.org/10.1016/j.dnarep.2007.02.009>.
- 550 33. van Opijnen T, Camilli A. 2012. A fine scale phenotype-genotype virulence map of a bacterial  
551 pathogen. *Genome Research* 22:2541–2551. <https://doi.org/10.1101/gr.137430.112>.
- 552 34. Asada S, Takano M, Shibasaki I. 1979. Deoxyribonucleic acid strand breaks during drying of  
553 *Escherichia coli* on a hydrophobic filter membrane. *Applied and Environmental Microbiology*  
554 37:266–273. <https://doi.org/10.1128/AEM.37.2.266-273.1979>.
- 555 35. Dose K, Bieger-Dose A, Labusch M, Gill M. 1992. Survival in extreme dryness and DNA-single-  
556 strand breaks. *Advances in Space Research* 12:221–229. [https://doi.org/10.1016/0273-](https://doi.org/10.1016/0273-1177(92)90176-X)  
557 [1177\(92\)90176-X](https://doi.org/10.1016/0273-1177(92)90176-X).
- 558 36. Dose K, Bieger-Dose A, Kerz O, Gill M. 1991. DNA-strand breaks limit survival in extreme  
559 dryness. *Origins of Life and Evolution of the Biosphere* 21:177–187.  
560 <https://doi.org/10.1007/BF01809446>.
- 561 37. Hazra TK, Hill JW, Izumi T, Mitra S. 2001. Multiple DNA glycosylases for repair of 8-oxoguanine  
562 and their potential in Vivo functions, p. 193–205. *In Progress in Nucleic Acid Research and*  
563 *Molecular Biology*. [https://doi.org/10.1016/S0079-6603\(01\)68100-5](https://doi.org/10.1016/S0079-6603(01)68100-5).
- 564 38. Lisher JP, Tsui H-CT, Ramos-Montañez S, Hentchel KL, Martin JE, Trinidad JC, Winkler ME,  
565 Giedroc DP. 2017. Biological and Chemical Adaptation to Endogenous Hydrogen Peroxide  
566 Production in *Streptococcus pneumoniae* D39. *mSphere* 2.  
567 <https://doi.org/10.1128/mSphere.00291-16>.
- 568 39. Yeung AT, Mattes WB, Oh EY, Grossman L. 1983. Enzymatic properties of purified *Escherichia*  
569 *coli* uvrABC proteins. *Proceedings of the National Academy of Sciences* 80:6157–6161.  
570 <https://doi.org/10.1073/pnas.80.20.6157>.



- 571 40. Minko IG, Kurtz AJ, Croteau DL, Van Houten B, Harris TM, Lloyd RS. 2005. Initiation of Repair  
572 of DNA–Polypeptide Cross-Links by the UvrABC Nuclease †. *Biochemistry* 44:3000–3009.  
573 <https://doi.org/10.1021/bi0478805>.
- 574 41. Snowden A, Kow YW, Van Houten B. 1990. Damage repertoire of the Escherichia coli UvrABC  
575 nuclease complex includes abasic sites, base-, damage analogues, and lesions containing  
576 adjacent 5' or 3' nicks. *Biochemistry* 29:7251–7259. <https://doi.org/10.1021/bi00483a013>.
- 577 42. Bieger-Dose A, Dose K, Meffert R, Mehler M, Risi S. 1992. Extreme dryness and DNA-protein  
578 cross-links. *Advances in Space Research* 12:265–270. [https://doi.org/10.1016/0273-  
579 1177\(92\)90181-V](https://doi.org/10.1016/0273-1177(92)90181-V).
- 580 43. Potts M. 1994. Desiccation tolerance of prokaryotes. *Microbiological Reviews* 58:755–805.  
581 <https://doi.org/10.1128/MMBR.58.4.755-805.1994>.
- 582 44. Unsay JD, Cosentino K, Subburaj Y, García-Sáez AJ. 2013. Cardiolipin effects on membrane  
583 structure and dynamics. *Langmuir*. <https://doi.org/10.1021/la402669z>.
- 584 45. Straume D, Piechowiak KW, Olsen S, Stamsås GA, Berg KH, Kjos M, Heggenhougen MV,  
585 Alcorlo M, Hermoso JA, Håvarstein LS. 2020. Class A PBPs have a distinct and unique role in  
586 the construction of the pneumococcal cell wall. *Proceedings of the National Academy of  
587 Sciences* 117:6129–6138. <https://doi.org/10.1073/pnas.1917820117>.
- 588 46. Hoskins J, Matsushima P, Mullen DL, Tang J, Zhao G, Meier TI, Nicas TI, Jaskunas SR. 1999.  
589 Gene Disruption Studies of Penicillin-Binding Proteins 1a, 1b, and 2a in *Streptococcus  
590 pneumoniae*. *Journal of Bacteriology* 181:6552–6555. [https://doi.org/10.1128/JB.181.20.6552-  
591 6555.1999](https://doi.org/10.1128/JB.181.20.6552-6555.1999).
- 592 47. McPherson DC, Popham DL. 2003. Peptidoglycan Synthesis in the Absence of Class A  
593 Penicillin-Binding Proteins in *Bacillus subtilis*. *Journal of Bacteriology* 185:1423–1431.  
594 <https://doi.org/10.1128/JB.185.4.1423-1431.2003>.
- 595 48. Vigouroux A, Cordier B, Aristov A, Alvarez L, Özbaykal G, Chaze T, Oldewurtel ER, Matondo  
596 M, Cava F, Bikard D, van Teeffelen S. 2020. Class-A penicillin binding proteins do not

- 597 contribute to cell shape but repair cell-wall defects. *eLife* 9. <https://doi.org/10.7554/eLife.51998>.
- 598 49. Alpert P. 2006. Constraints of tolerance: why are desiccation-tolerant organisms so small or  
599 rare? *Journal of Experimental Biology* 209:1575–1584. <https://doi.org/10.1242/jeb.02179>.
- 600 50. Silva-Valenzuela CA, Lazinski DW, Kahne SC, Nguyen Y, Molina-Quiroz RC, Camilli A. 2017.  
601 Growth arrest and a persister state enable resistance to osmotic shock and facilitate  
602 dissemination of *Vibrio cholerae*. *The ISME Journal* 11:2718–2728.  
603 <https://doi.org/10.1038/ismej.2017.121>.
- 604 51. Zafar MA, Wang Y, Hamaguchi S, Weiser JN. 2017. Host-to-Host Transmission of  
605 *Streptococcus pneumoniae* Is Driven by Its Inflammatory Toxin, Pneumolysin. *Cell Host &*  
606 *Microbe* 21:73–83. <https://doi.org/10.1016/j.chom.2016.12.005>.
- 607 52. Buonanno M, Ponnaiya B, Welch D, Stanislauskas M, Randers-Pehrson G, Smilenov L, Lowy  
608 FD, Owens DM, Brenner DJ. 2017. Germicidal Efficacy and Mammalian Skin Safety of 222-nm  
609 UV Light. *Radiation Research* 187:493–501. <https://doi.org/10.1667/RR0010CC.1>.
- 610 53. Matafonova GG, Batoev VB, Astakhova SA, Gómez M, Christofi N. 2008. Efficiency of KrCl  
611 excilamp (222 nm) for inactivation of bacteria in suspension. *Letters in Applied Microbiology*  
612 47:508–513. <https://doi.org/10.1111/j.1472-765X.2008.02461.x>.
- 613 54. Welch D, Buonanno M, Grilj V, Shuryak I, Crickmore C, Bigelow AW, Randers-Pehrson G,  
614 Johnson GW, Brenner DJ. 2018. Far-UVC light: A new tool to control the spread of airborne-  
615 mediated microbial diseases. *Scientific Reports* 8:2752. <https://doi.org/10.1038/s41598-018-21058-w>.
- 616
- 617 55. McCullers JA, Karlström Å, Iverson AR, Loeffler JM, Fischetti VA. 2007. Novel Strategy to  
618 Prevent Otitis Media Caused by Colonizing *Streptococcus pneumoniae*. *PLoS Pathogens*  
619 3:e28. <https://doi.org/10.1371/journal.ppat.0030028>.
- 620 56. Horton RM, Cai ZL, Ho SN, Pease LR. 1990. Gene splicing by overlap extension: tailor-made  
621 genes using the polymerase chain reaction. *BioTechniques* 8:528–35.
- 622 57. van Opijnen T, Bodi KL, Camilli A. 2009. Tn-seq: high-throughput parallel sequencing for fitness

623 and genetic interaction studies in microorganisms. *Nature Methods* 6:767–772.

624 <https://doi.org/10.1038/nmeth.1377>.

625 58. Langmead B, Trapnell C, Pop M, Salzberg SL. 2009. Ultrafast and memory-efficient alignment  
626 of short DNA sequences to the human genome. *Genome Biology* 10:R25.

627 <https://doi.org/10.1186/gb-2009-10-3-r25>.

628  
629  
630 **ACKNOWLEDGEMENTS**

631 This research was supported by National Institutes of Health training grant GM139772 (A.J.M.).  
632  
633  
634  
635  
636  
637  
638  
639  
640  
641  
642  
643  
644  
645  
646  
647  
648  
649

650  
651

## FIGURES AND TABLES

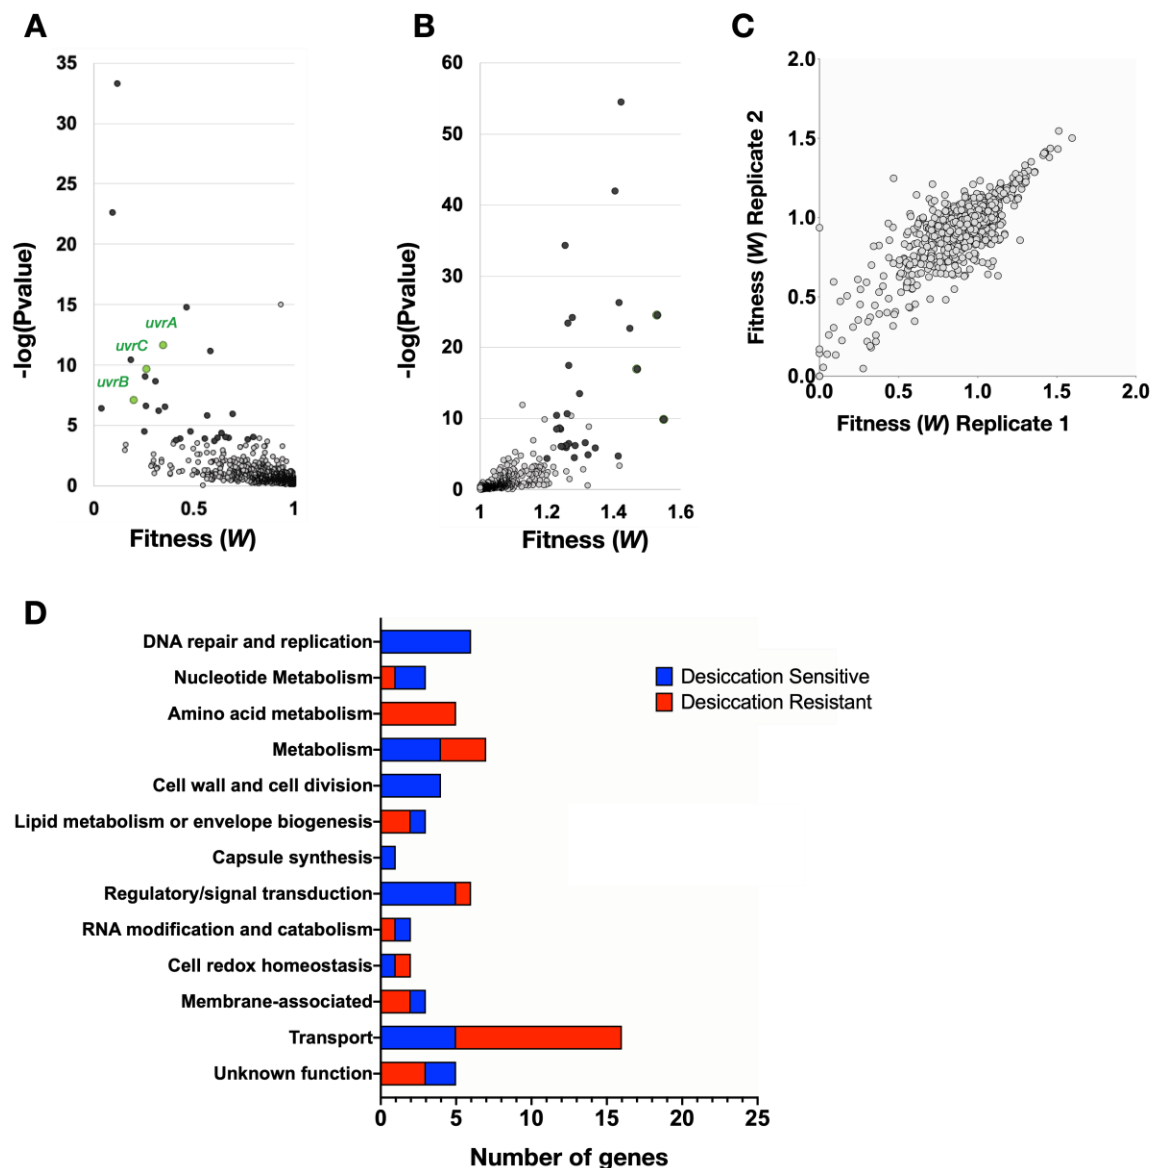

652  
653

**Figure 1. Desiccation tolerance Tn-seq results.**

654

Volcano plots of Tn-seq results display statistical significance against fitness for both (A) desiccation

655

sensitive transposon mutants and (B) desiccation resistant mutants. Mutants with a 20% or greater

656

change in fitness that are above the  $-\log(\text{Pvalue})$  cutoff of 3.633 are highlighted in black. The three

657

components of the highly enriched nucleotide excision repair complex UvrABC are highlighted in

658

green. (C) Reproducibility of the two biological replicates is demonstrated by a Pearson's correlation

659

of  $R=0.801$ . (D) Significant hits from the screen were categorized by function using annotations and

660

GO terms from Kegg genome database and UniProt. The number of genes within each category is

661

quantified on the X-axis.

662

663

**Table 1. Putative desiccation tolerance genes from the Tn-seq screen**

| Desiccation Sensitive |                      |                      | Desiccation Resistant |               |                      |
|-----------------------|----------------------|----------------------|-----------------------|---------------|----------------------|
| D39 Locus             | Gene                 | Fitness <sup>a</sup> | D39 Locus             | Gene          | Fitness <sup>a</sup> |
| SPD_1998              | <i>adcB</i>          | 0.04                 | SPD_0670              |               | 1.21                 |
| SPD_1542              | <i>stkP</i>          | 0.05                 | SPD_0700              | <i>pepN</i>   | 1.21                 |
| SPD_1099              |                      | 0.06                 | SPD_1677              | <i>rafE</i>   | 1.21                 |
| SPD_2000              | <i>adcR</i>          | 0.09                 | SPD_1418              |               | 1.21                 |
| SPD_1098              |                      | 0.09                 | SPD_1491              |               | 1.22                 |
| SPD_0185              |                      | 0.12                 | SPD_0542              | <i>pepV</i>   | 1.22                 |
| SPD_1084              | <i>vick</i>          | 0.13                 | SPD_1676              | <i>rafF</i>   | 1.22                 |
| SPD_0320              | <i>cps2T</i>         | 0.14                 | SPD_1166              |               | 1.23                 |
| SPD_1797              | <i>ccpA</i>          | 0.17                 | SPD_1068              | <i>udk</i>    | 1.23                 |
| SPD_2055              | <i>guaB</i>          | 0.18                 | SPD_0641              | <i>manA</i>   | 1.23                 |
| SPD_1096              | <i>uvrB</i>          | 0.20                 | SPD_0685              | <i>gor</i>    | 1.24                 |
| SPD_0980              | <i>prs2</i>          | 0.25                 | SPD_1667              | <i>amiF</i>   | 1.24                 |
| SPD_1740              | <i>cinA</i>          | 0.26                 | SPD_0820              | <i>rluD</i>   | 1.24                 |
| SPD_0330              | <i>rfbB</i>          | 0.26                 | SPD_1669              | <i>amiD</i>   | 1.25                 |
| SPD_0129              | <i>gidA</i>          | 0.26                 | SPD_1971              |               | 1.25                 |
| SPD_0538              | <i>uvrC</i>          | 0.26                 | SPD_1635              | <i>galR</i>   | 1.25                 |
| SPD_1779              |                      | 0.31                 | SPD_0437              | <i>ribU</i>   | 1.26                 |
| SPD_1295              | <i>Hemolysin III</i> | 0.33                 | SPD_1409              | <i>mshmK</i>  | 1.26                 |
| SPD_0176              | <i>uvrA</i>          | 0.35                 | SPD_1450              | <i>mntR</i>   | 1.26                 |
| SPD_0010              |                      | 0.35                 | SPD_1668              | <i>amiE</i>   | 1.26                 |
| SPD_2032              | <i>pde1</i>          | 0.35                 | SPD_1670              | <i>amiC</i>   | 1.26                 |
| SPD_1121              |                      | 0.38                 | SPD_1487              |               | 1.26                 |
| SPD_1778              | <i>rmuC</i>          | 0.39                 | SPD_0787              | <i>pepX</i>   | 1.26                 |
| SPD_1549              | <i>rnY</i>           | 0.40                 | SPD_1487              |               | 1.27                 |
| SPD_0646              |                      | 0.40                 | SPD_1634              | <i>galK</i>   | 1.27                 |
| SPD_1104              |                      | 0.44                 | SPD_1671              | <i>amiA</i>   | 1.28                 |
| SPD_0336              | <i>pbp1A</i>         | 0.46                 | SPD_1633              | <i>galT-2</i> | 1.28                 |
| SPD_0996              |                      | 0.48                 | SPD_1165              |               | 1.28                 |
| SPD_0268              |                      | 0.50                 | SPD_1171              |               | 1.28                 |
| SPD_1298              |                      | 0.55                 | SPD_0064              | <i>cpsR</i>   | 1.30                 |
| SPD_1333              |                      | 0.56                 | SPD_0819              | <i>lspA</i>   | 1.32                 |
| SPD_0342              | <i>mapZ</i>          | 0.57                 | SPD_2046              | <i>cbiQ</i>   | 1.32                 |
| SPD_1821              | <i>pbp2A</i>         | 0.58                 | SPD_0065              | <i>bgaC</i>   | 1.32                 |
| SPD_1622              |                      | 0.62                 | SPD_2047              | <i>cbiO1</i>  | 1.33                 |
| SPD_0953              | <i>ppc</i>           | 0.64                 | SPD_2048              | <i>cbiO2</i>  | 1.33                 |
| SPD_1867              |                      | 0.66                 | SPD_1170              | <i>appA</i>   | 1.40                 |
| SPD_2068              | <i>htrA</i>          | 0.67                 | SPD_1375              |               | 1.41                 |
| SPD_0366              | <i>recD2</i>         | 0.69                 | SPD_1169              | <i>appB</i>   | 1.42                 |
| SPD_1621              |                      | 0.71                 | SPD_1167              | <i>appD</i>   | 1.42                 |
| SPD_0068              | <i>gadE</i>          | 0.71                 | SPD_1168              | <i>appC</i>   | 1.45                 |
| SPD_0535              | <i>murM/fibA</i>     | 0.72                 | SPD_0513              | <i>cysE</i>   | 1.45                 |
| SPD_1274              | <i>guaA</i>          | 0.75                 | SPD_1678              | <i>agaN</i>   | 1.47                 |
|                       |                      |                      | SPD_0150              | <i>gshT</i>   | 1.53                 |
|                       |                      |                      | SPD_0818              | <i>cmbR</i>   | 1.55                 |
|                       |                      |                      | SPD_0636              | <i>spxB</i>   | 1.67                 |

664

665

666

667

a. Average fitness between the two biological replicates (In cases where the gene did not meet analytical cutoffs for read counts and Tn insertions in one biological replicate, only the fitness of the significant replicate is displayed).

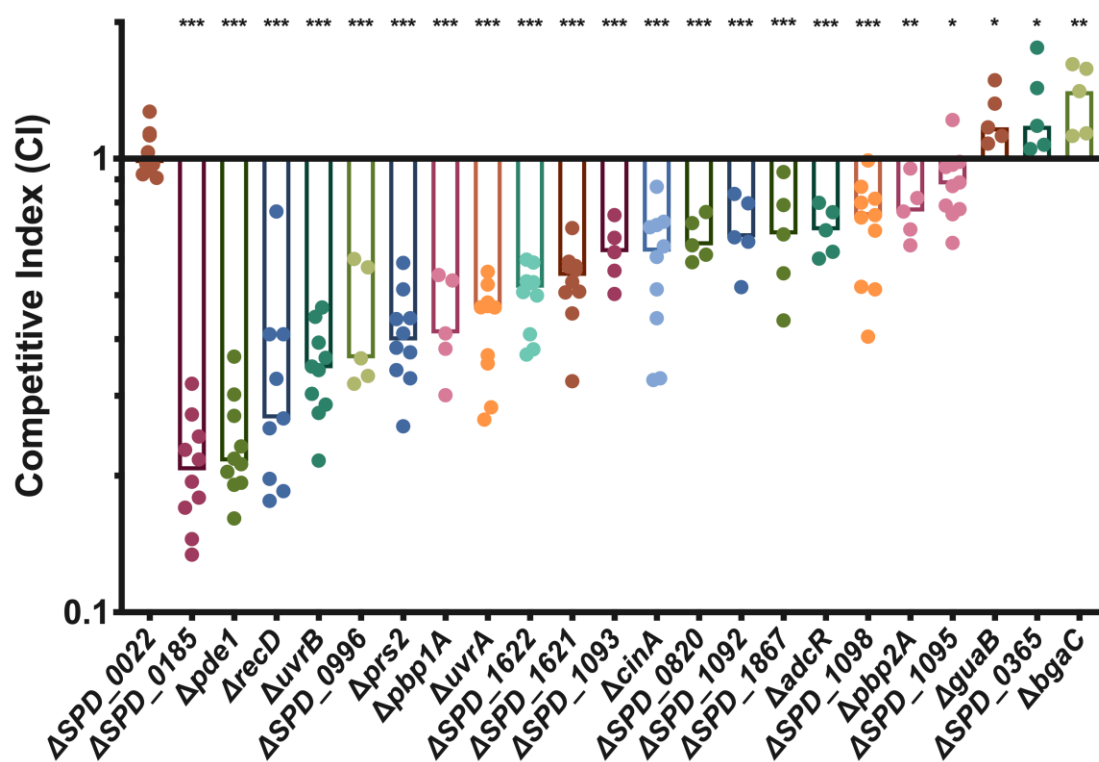

**Figure 2. Competitive indices of desiccation tolerance genes.**

28 putative desiccation tolerance genes identified in the Tn-seq were deleted and then tested in a 4-day desiccation competition assay against wild-type. Strains in this figure are the 22 deletion mutants that validated in addition to a neutral gene *SPD\_0022*. Competitive index was calculated as the ratio of mutant to wild-type after desiccation divided by the ratio before desiccation. The median for each mutant is represented with a bar. Statistical analyses were performed using a non-parametric Mann Whitney U two sample rank test comparing each mutant against the neutral gene *SPD\_0022* (\*\*\*,  $P \leq 0.001$ ; \*\*,  $P \leq 0.002$ ; \*,  $P \leq 0.033$ ).

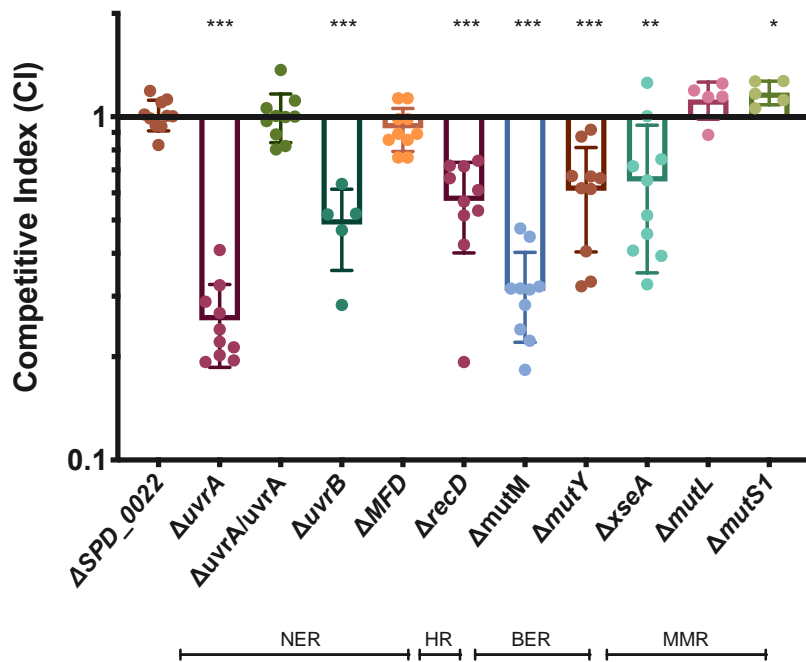

685

686

687

### Figure 3. Multiple DNA repair pathways are required for desiccation tolerance.

688

4-day desiccations were performed on mutants representing a number of DNA repair pathways:

689

Nucleotide excision repair (NER), homologous recombination (HR), base excision repair (BER), and

690

mismatch repair (MMR).  $\Delta uvrA/uvrA$  is the *uvrA* deletion mutant with the full gene and native

691

promoter complemented on the chromosome at neutral gene locus *SPD\_0022*. Competitive index

692

was calculated as the ratio of mutant to wild-type after desiccation over the input ratio. Statistical

693

analyses were performed using a non-parametric Mann Whitney U two sample rank test comparing

694

each mutant against the neutral gene *SPD\_0022* (\*\*\*,  $P \leq 0.001$ ; \*\*,  $P \leq 0.002$ ; \*,  $P \leq 0.033$ ).

695



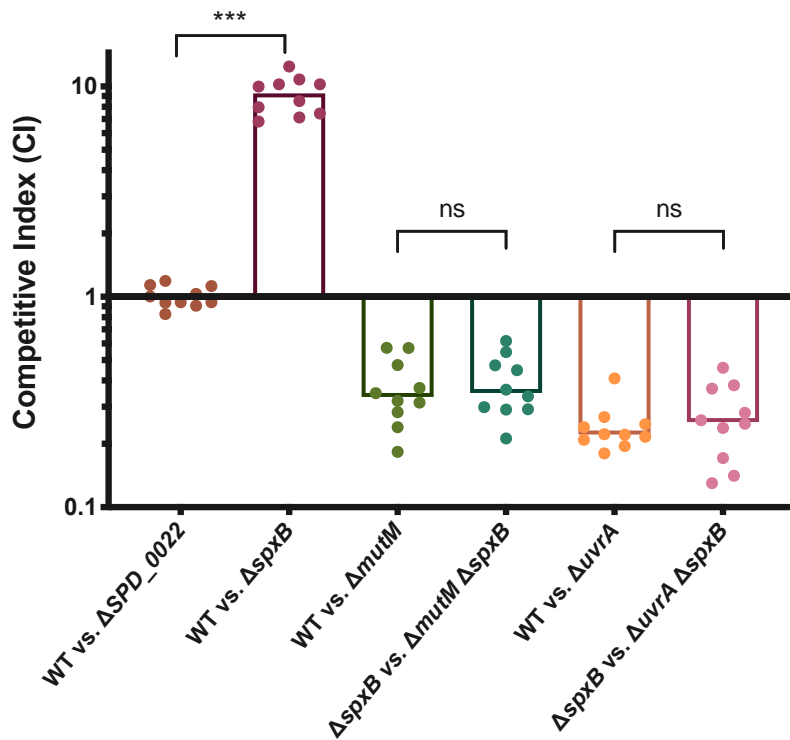

696

697

698

699

#### Figure 4. Hydrogen peroxide produced by SpxB is not a primary cause of DNA damage during desiccation

700

701

Pyruvate oxidase (SpxB) is responsible for the majority of hydrogen peroxide produced by *S.*

702

*pneumoniae*. In order to determine if endogenous hydrogen peroxide results in oxidative DNA

703

damage that is repaired by MutM or UvrA, we deleted *spxB* both the wild-type and DNA repair mutant

704

backgrounds. Competitive indices were calculated as the ratio of mutant to wild-type (or double

705

mutant to single mutant) after desiccation compared to the input. Statistical analyses were performed

706

using a non-parametric Mann Whitney U two sample rank test (\*\*\*,  $P \leq 0.001$ , ns = non-significant).

707

708

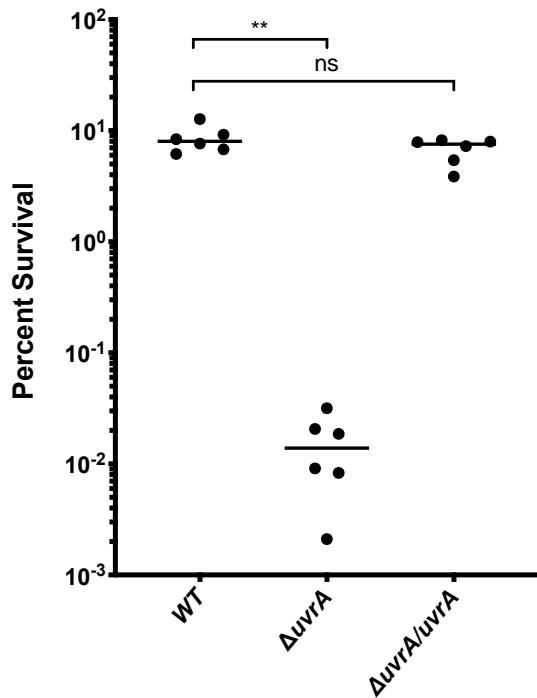

709

710

### 711 **Figure 5. Bacterial survival after UV irradiation**

712 Exponentially growing cultures of *S. pneumoniae* strains were washed and resuspended in PBS and  
713 then challenged with 15 millijoules of ultraviolet (UV) light. Percent survival was quantified by plating  
714 bacteria for CFU before and after UV exposure. The *uvrA* deletion mutant ( $\Delta uvrA$ ) was complemented  
715 ( $\Delta uvrA/uvrA$ ) by placing the full gene and native promoter at neutral gene locus *SPD\_0022*. Statistical  
716 analyses were performed using a non-parametric Mann-Whitney U two sample rank test (\*\*,  $P \leq 0.002$ ,  
717 ns = non-significant).

718

719

720

721

722

723

724

725

726

727

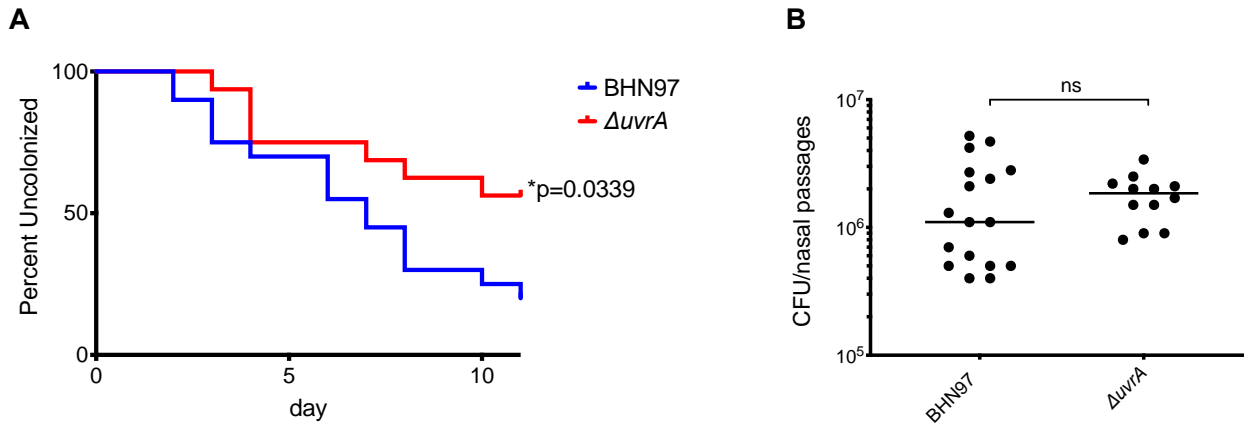

**Figure 6. Transmission efficiency of a *uvrA* mutant.**

Litters of 4-day old, C57/BL6 mice were split into two groups. The first group was colonized with a wild-type or mutant strain of serotype 19F *S. pneumoniae*, while the second half was left uncolonized. All mice were then returned to the cage and uncolonized mice were surveyed daily for transmission by tapping the nares of each mouse against a blood agar plate. A colonization event was defined as detectable CFU on two subsequent days. (A) Transmission of wild-type (BHN97) and  $\Delta uvrA$  was tracked over the course of 10 days. (B) Colonization levels of all donor mice were assessed at the end of the experiment. Statistics were performed with Mantel-cox log-rank test for the transmission assay and Mann-Whitney U two sample rank test for the colonization (\*,  $P \leq 0.033$ ; ns = non-significant).

**Table 2. Bacterial strains used in this study**

| Strain                      | Description                            | Source     |
|-----------------------------|----------------------------------------|------------|
| <u><i>S. pneumoniae</i></u> |                                        |            |
| D39                         | <i>S. pneumoniae</i> , serotype 2      | Lab stock  |
| AC6529                      | D39 SPD_0185::CmR                      | This study |
| AC6539                      | D39 SPD_2032 ( <i>pde1</i> )::CmR      | This study |
| AC6547                      | D39 SPD_0366 ( <i>recD</i> )::CmR      | This study |
| AC6532                      | D39 SPD_1096 ( <i>uvrB</i> )::CmR      | This study |
| AC6541                      | D39 SPD_0996::CmR                      | This study |
| AC6533                      | D39 SPD_0980 ( <i>prs2</i> )::CmR      | This study |
| AC6540                      | D39 SPD_0336 ( <i>pbp1A</i> )::CmR     | This study |
| AC6538                      | D39 SPD_0176 ( <i>uvrA</i> )::CmR      | This study |
| AC6543                      | D39 SPD_1622::CmR                      | This study |
| AC6546                      | D39 SPD_1621::CmR                      | This study |
| AC6549                      | D39 SPD_1093::CmR                      | This study |
| AC6534                      | D39 SPD_1740 ( <i>cinA</i> )::CmR      | This study |
| AC6553                      | D39 SPD_0820 ( <i>rluD</i> )::CmR      | This study |
| AC6548                      | D39 SPD_1092::CmR                      | This study |
| AC6545                      | D39 SPD_1867::CmR                      | This study |
| AC6537                      | D39 SPD_2000 ( <i>adcR</i> )::CmR      | This study |
| AC6528                      | D39 SPD_1098::CmR                      | This study |
| AC6542                      | D39 SPD_1821 ( <i>pbp1A</i> )::CmR     | This study |
| AC6551                      | D39 SPD_1095::CmR                      | This study |
| AC6550                      | D39 SPD_0128::CmR                      | This study |
| AC6554                      | D39 SPD_1450 ( <i>mntR</i> )::CmR      | This study |
| AC6535                      | D39 SPD_1999 ( <i>adcC</i> )::CmR      | This study |
| AC6561                      | D39 SPD_0022::CmR                      | This study |
| AC6530                      | D39 SPD_1099::CmR                      | This study |
| AC6552                      | D39 SPD_1094::CmR::CmR                 | This study |
| AC6531                      | D39 SPD_2055 ( <i>guaB</i> )::CmR      | This study |
| AC6544                      | D39 SPD_0365 ( <i>tig</i> )::CmR       | This study |
| AC6555                      | D39 SPD_0064::CmR                      | This study |
| AC6556                      | D39 SPD_0065 ( <i>bgaC</i> )::CmR      | This study |
| AC6674                      | D39 SPD_0006 ( <i>MFD</i> )::CmR       | This study |
| AC6675                      | D39 SPD_1135 ( <i>mutM</i> )::CmR      | This study |
| AC6676                      | D39 SPD_1086 ( <i>mutY</i> )::CmR      | This study |
| AC6677                      | D39 SPD_1067 ( <i>xseA</i> )::CmR      | This study |
| AC6678                      | D39 SPD_0165 ( <i>mutL</i> )::CmR      | This study |
| AC6679                      | D39 SPD_0371 ( <i>mutS1</i> )::CmR     | This study |
| AC6680                      | AC6538 SPD_0022::SPD_0176              | This study |
| AC6681                      | D39 SPD_0636 ( <i>spxB</i> )::SpecR    | This study |
| AC6682                      | AC6538 SPD_0636 ( <i>spxB</i> )::SpecR | This study |
| AC6683                      | AC6675 SPD_0636 ( <i>spxB</i> )::SpecR | This study |

|                       |                                |            |
|-----------------------|--------------------------------|------------|
|                       | BHN97                          | (55)       |
|                       | BHN97 $\Delta uvrA$            | This study |
|                       | BHN97 $\Delta peg.242$         | This study |
|                       | BHN97 $\Delta peg.905$         | This study |
|                       | BHN97 $\Delta bgaC$            | This study |
| <u><i>E. coli</i></u> |                                |            |
| AC1304                | E. coli (pMalC9); ApR          | (29)       |
| AC3687                | E. coli (pMagellan6); ApR, SpR | (29)       |

---

750
